# Supplementary material for: Motility and tumor infiltration are key aspects of invariant natural killer T cell anti-tumor function
Source: PubMed Central journal article supplement (PMC10853287; doi:10.1038/s41467-024-45208-z), 2024-02-09
Supplement: 41467_2024_45208_MOESM1_ESM.pdf [file 41467_2024_45208_MOESM1_ESM.pdf]

## Supplementary Information

### **Motility and tumour infiltration are key aspects of invariant natural killer T cell anti-tumour function**

Chenxi Tian<sup>1</sup>, Yu Wang<sup>1</sup>, Miya Su<sup>1</sup>, Yuanyuan Huang<sup>1</sup>, Yuwei Zhang<sup>1</sup>, Jiaxiang Dou<sup>2</sup>, Changfeng Zhao<sup>1</sup>, Yuting Cai<sup>1</sup>, Jun Pan<sup>1</sup>, Shiyu Bai<sup>1</sup>, Qielan Wu<sup>1</sup>, Sanwei Chen<sup>3</sup>, Shuhang Li<sup>1</sup>, Di Xie<sup>1</sup>, Rong Lv<sup>4</sup>, Yusheng Chen<sup>2</sup>, Yucai Wang<sup>1,5</sup>, Sicheng Fu<sup>1,\*</sup>, Huimin Zhang<sup>1,\*</sup>, Li Bai<sup>1,2,5,6,\*</sup>

<sup>1</sup>Hefei national Research Center for Physical Sciences at the Microscale, Center for Advanced Interdisciplinary Science and Biomedicine of IHM, Division of Life Sciences and Medicine, University of Science and Technology of China, Hefei, China.

<sup>2</sup>Institute of Health and Medicine, Hefei Comprehensive National Science Center, Hefei, China.

<sup>3</sup>The First Affiliated Hospital of Anhui Medical University, Hefei, China.

<sup>4</sup>Anhui Blood Center, Heifei, China.

<sup>5</sup>Biomedical Sciences and Health Laboratory of Anhui Province, Division of Life Sciences and Medicine, University of Science and Technology of China, Hefei, China.

<sup>6</sup>National Synchrotron Radiation Laboratory, University of Science and Technology of China, Hefei, China.

\*Correspondence to Sicheng Fu (fsc@mail.ustc.edu.cn), Huimin Zhang (hmzhang@ustc.edu.cn), and Li Bai (baili@ustc.edu.cn; ORCID: 0000000290281920).

### **The PDF file includes:**

Supplementary Fig. 1 to 8

Supplementary Table

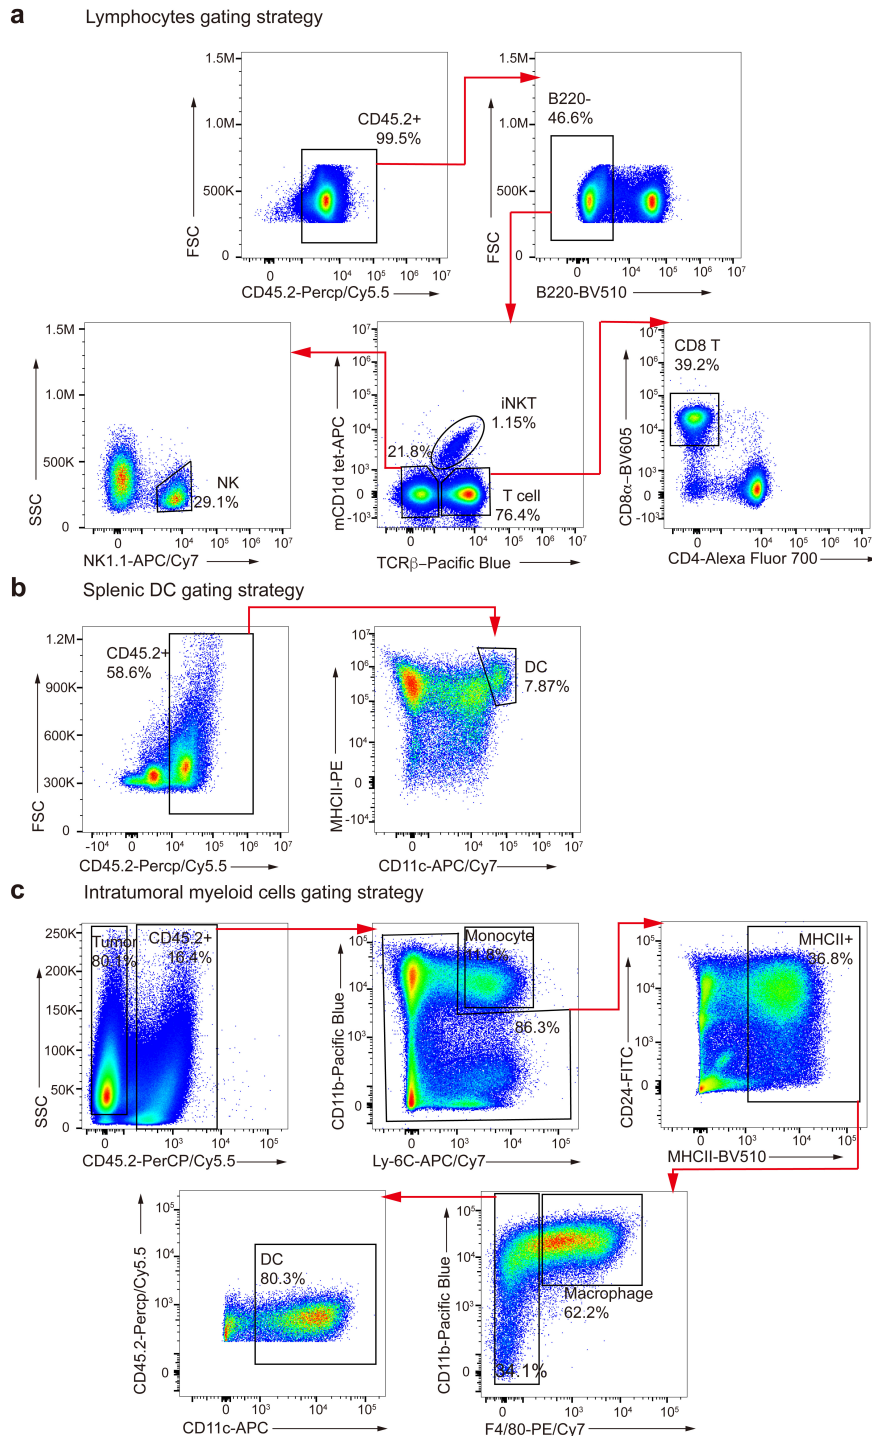

**Supplementary Fig. 1 Gating strategy for lymphocytes and myeloid cells. a,** Gating strategy for identification of indicated lymphocytes including NK cells, iNKT cells, and CD8 T cells. **b,** Gating strategy for identification of splenic DCs. **c,** Gating strategy for identification of intratumoral myeloid cells including monocytes, DCs, and macrophages. The gating strategy were used in Fig. 2, Fig. 3, Fig. 4, Fig. 5, Fig. 6, Fig. 7, Fig. 8, Supplementary Fig. 5, Supplementary Fig. 6, Supplementary Fig. 7.

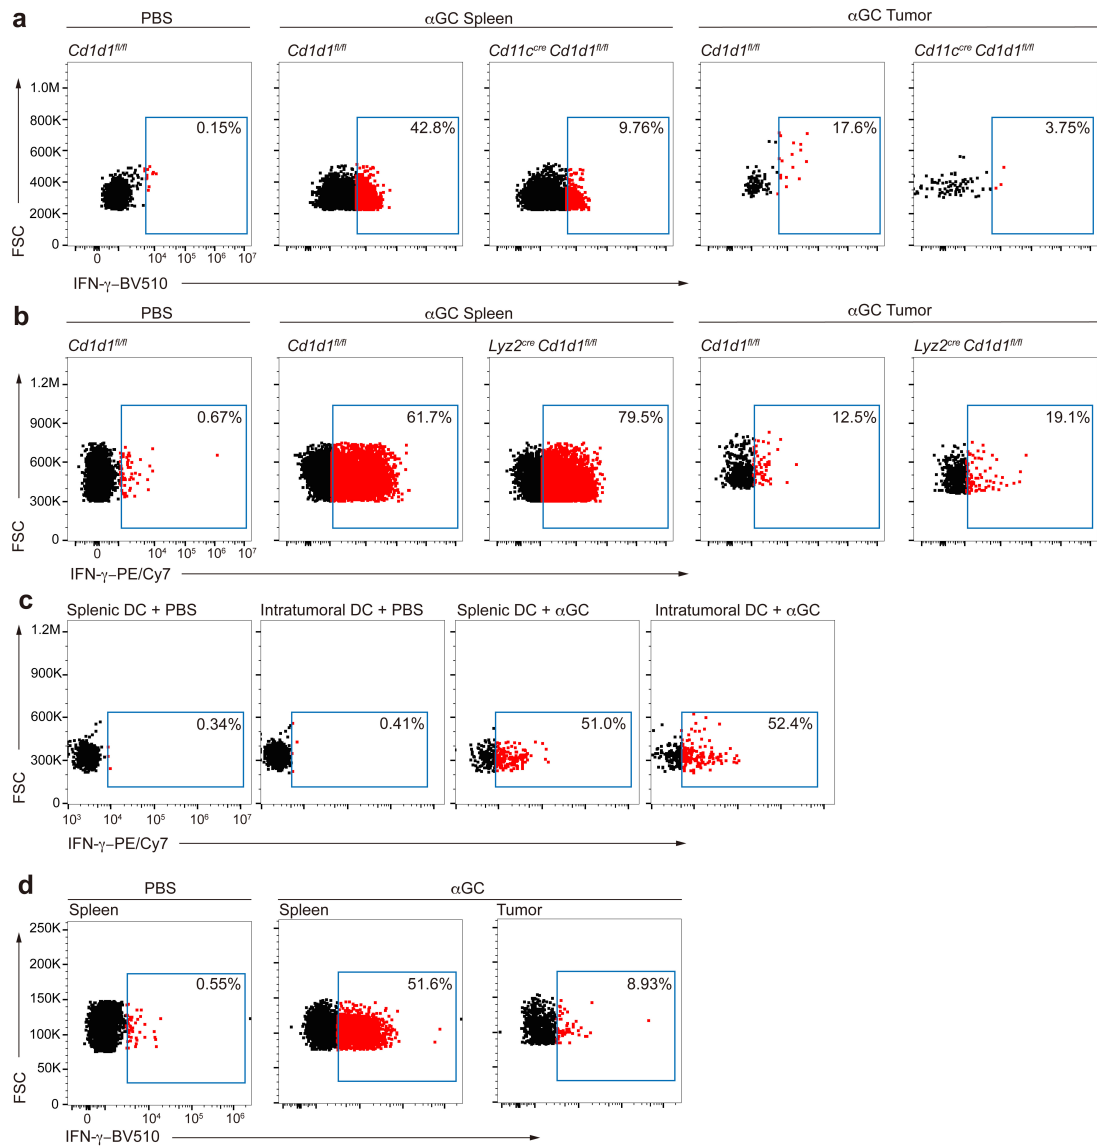

**Supplementary Fig. 2 Intratumoral DCs fail to activate iNKT cells efficiently *in vivo* despite their normal antigen presentation capacity.** **a**, Flow cytometry dot plots of IFN- $\gamma$  production in splenic iNKT cells and intratumoral iNKT cells from MC38 tumor-bearing *Cd11c<sup>cre</sup> Cd1d1<sup>fl/fl</sup>* mice and *Cd1d1<sup>fl/fl</sup>* mice, after  $\alpha$ GC injection. **b**, Flow cytometry dot plots of IFN- $\gamma$  production in splenic iNKT cells and intratumoral iNKT cells from MC38 tumor-bearing *Lyz2<sup>cre</sup> Cd1d1<sup>fl/fl</sup>* mice and *Cd1d1<sup>fl/fl</sup>* mice, after  $\alpha$ GC injection. **c**, Flow cytometry dot plots of IFN- $\gamma$  production in hepatic iNKT cells activated by splenic or intratumoral DCs pre-loaded with PBS or  $\alpha$ GC for 12 hours *in vitro*. **d**, Flow cytometry dot plots of IFN- $\gamma$  production in splenic iNKT cells and intratumoral iNKT cells from MC38 tumor-bearing WT mice, after  $\alpha$ GC injection. Supplementary Fig. 2 corresponds to Fig. 2b, Fig. 2c, Fig. 2d, Fig. 2f.

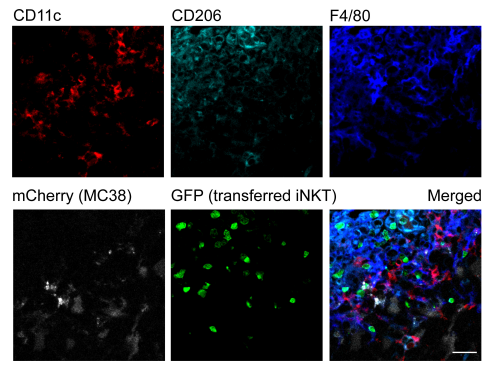

**Supplementary Fig. 3 Characterization of macrophages in tumors.** Staining of CD11c, CD206, F4/80 in MC38-mCherry tumors transferred with GFP<sup>+</sup> iNKT cells ( $n = 4$ ). Scale Bar, 20  $\mu$ m. Data are representative of four independent experiments.

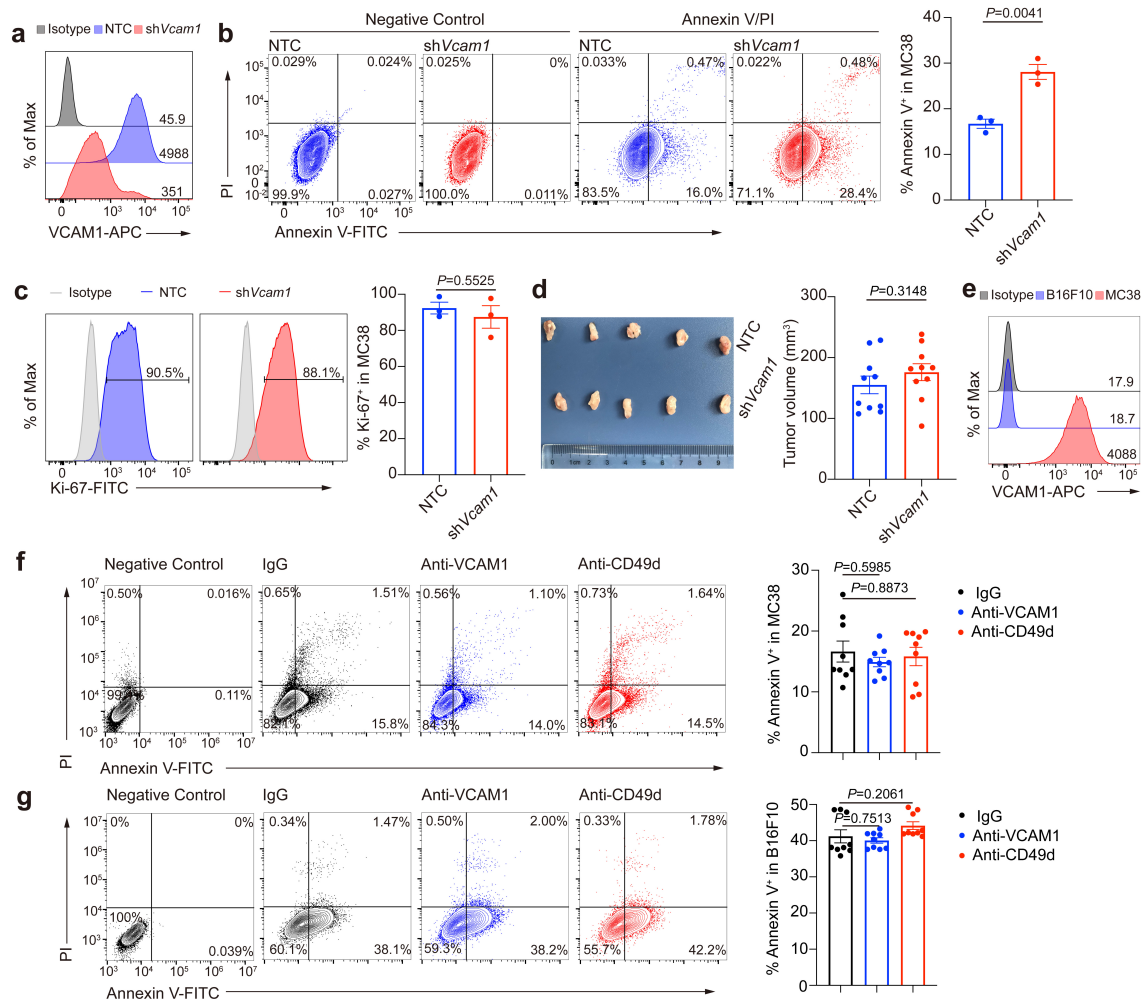

**Supplementary Fig. 4 Different influences of *Vcam1* knockdown and antibody blockage on tumor cell apoptosis.** **a**, VCAM1 expression in *Vcam1* knockdown MC38 cells and NTC MC38 cells. NTC, none target control. **b-c**, Influences of *Vcam1* knockdown on apoptosis (**b**) and proliferation (**c**) of MC38 cells ( $n = 3$ ). **d**, Picture and weight of *Vcam1* knockdown MC38 tumors and NTC MC38 tumors, after injecting  $1.5 \times 10^6$  *Vcam1* knockdown MC38 cells or  $1 \times 10^6$  NTC MC38 cells into WT mice for 8 days ( $n = 10$  mice per group). **e**, VCAM1 expression in B16F10 and MC38 tumor cells. **f-g**, Apoptosis of MC38 (**f**,  $n = 9$ ) and B16F10 (**g**,  $n = 9$ ) tumor cells treated with IgG isotype control antibody, anti-VCAM1 antibody or anti-CD49d antibody. Data are represented as mean  $\pm$  SEM. Data are representative of (**a-g**) or pooled from (**b-d**, **f-g**) three independent experiments. Data were analyzed by two-tailed unpaired Student's t-test (**b-d**) and one-way ANOVA (**f**, **g**). Source data are provided as a Source Data file.

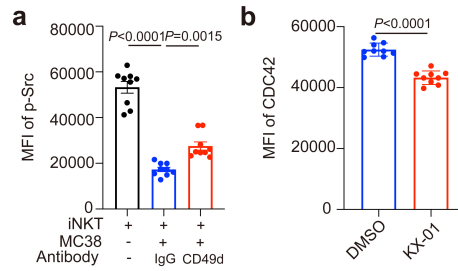

**Supplementary Fig. 5 VCAM1-CD49d signaling reduces CDC42 expression in iNKT cells through Src signaling pathway. a,** Phosphorylation of Src in iNKT cells co-cultured with or without MC38 tumor cells in the presence of anti-CD49d antibody or IgG isotype control antibody for 24 hours ( $n = 9$ ). **b,** CDC42 expression in iNKT cells in the presence of DMSO or Src inhibitor KX-01 ( $2 \mu\text{M}$ ) for 24 hours ( $n = 9$ ). Data are pooled from three independent experiments (**a-b**). Data are represented as mean  $\pm$  SEM, and were analyzed by one-way ANOVA (**a**) and two-tailed unpaired Student's  $t$ -test (**b**). Source data are provided as a Source Data file.

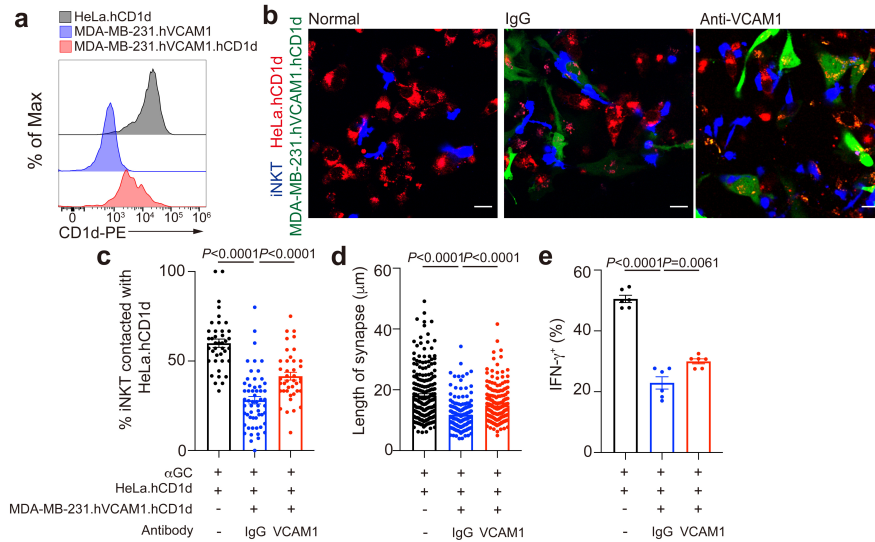

**Supplementary Fig. 6 VCAM1 in CD1d-expressing tumor cells inhibits human iNKT cell activation.** **a**, Expression of CD1d in HeLa.hCD1d, MDA-MB-231.hVCAM1, and MDA-MB-231.hVCAM1.hCD1d cells. **b-d**, Images (**b**), frequencies (**c**,  $n = 40, 56, 41$ ), and lengths of synapses (**d**,  $n = 225, 183, 196$  cells) of CTV-stained expanded human iNKT cells contacted with CMTPIX-stained  $\alpha$ GC-pulsed HeLa.hCD1d cells, in the absence or presence of MDA-MB-231.hVCAM1.hCD1d cells and indicated antibodies. Scale Bars, 20  $\mu$ m. **e**, IFN- $\gamma$  production in expanded human iNKT cells activated as in **b-d** ( $n = 6$ ). Data are representative of (**a-b**) or pooled from two independent experiments (**b-e**). Data are represented as mean  $\pm$  SEM, and were analyzed by one-way ANOVA (**c-e**). Source data are provided as a Source Data file.

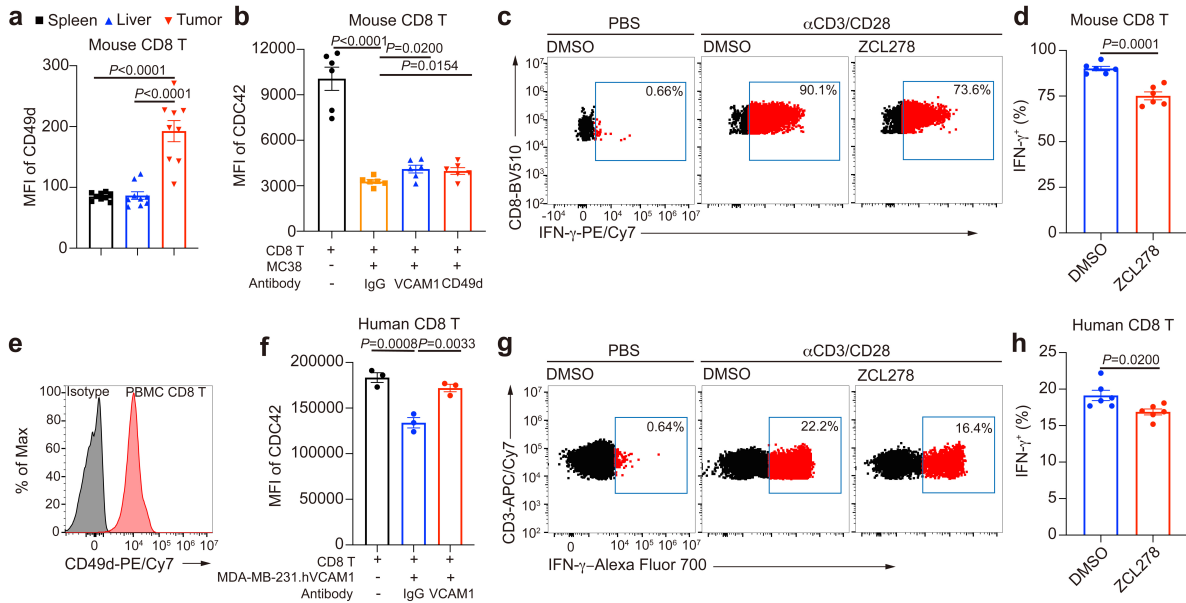

**Supplementary Fig. 7 Interfering with VCAM1 signaling promotes CDC42 expression and activation of mouse and human CD8 T cells.** **a**, CD49d expression in CD8 T cells from MC38 tumor-bearing WT mice ( $n = 9$  mice). **b**, CDC42 expression in mouse CD8 T cells co-cultured with or without MC38 cells in the presence of anti-VCAM1 antibody, anti-CD49d antibody, or IgG isotype control antibody for 24 hours ( $n = 6$  mice). **c-d**, Flow cytometry dot plots (**c**) and frequencies (**d**,  $n = 6$  mice) of IFN- $\gamma$  production in MFI CD8 T cells stimulated by plate-coated anti-CD3 ( $10 \mu\text{g ml}^{-1}$ ) and anti-CD28 ( $10 \mu\text{g ml}^{-1}$ ) in the presence of DMSO or ZCL278. **e**, CD49d expression in human CD8 T cells from PBMC. **f**, CDC42 expression in human CD8 T cells co-cultured with or without MDA-MB-231.hVCAM1 cells in the presence of anti-VCAM1 antibody or IgG isotype control antibody for 24 hours ( $n = 3$  samples). **g-h**, Flow cytometry dot plots (**g**) and frequencies (**h**,  $n = 6$  samples) of IFN- $\gamma$  production in human CD8 T cells stimulated by plate-coated anti-CD3 ( $10 \mu\text{g ml}^{-1}$ ) and anti-CD28 ( $10 \mu\text{g ml}^{-1}$ ) in the presence of DMSO or ZCL278. Data are representative of (**c**, **e**, **g**) or pooled from (**b**, **d**, **h**) two independent experiments. Data are represented as mean  $\pm$  SEM, and were analyzed by one-way ANOVA (**a**, **f**) and two-tailed unpaired Student's t-test (**b**, **d**, **h**). Source data are provided as a Source Data file.



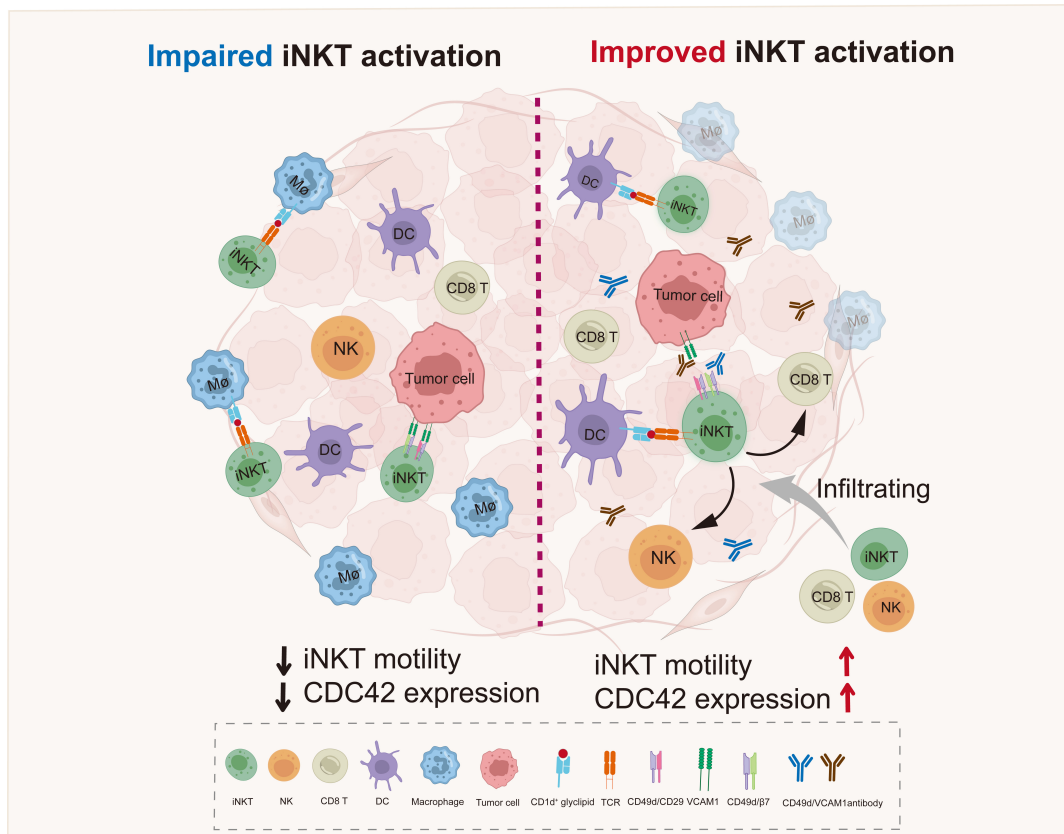

**Supplementary Fig. 8 Motility and tumor infiltration are key aspects influencing anti-tumor function of iNKT cells.** Macrophage-iNKT cell interactions and VCAM1 signaling inhibit infiltration and activation of iNKT cells in tumor. Interfering with macrophage-iNKT cell interactions and blocking VCAM1 signaling can improve efficacy of iNKT cell-based immunotherapy.

### Supplementary Table. Antibodies used for experiments

| Antibodies                                   | Clone       | Supplier  | Cat. No. | Dilution               |
|----------------------------------------------|-------------|-----------|----------|------------------------|
| <b>Mouse antibodies</b>                      |             |           |          |                        |
| Purified anti-mouse CD16/32                  | 93          | BioLegend | 101302   | 1:500                  |
| Ultra-LEAF Purified anti-mouse CD106 (VCAM1) | 429         | BioLegend | 105728   | 1:100                  |
| Ultra-LEAF Purified anti-mouse CD49d         | 9C10        | BioLegend | 103709   | 1:100                  |
| Ultra-LEAF Purified Rat IgG2a                | RTK2758     | BioLegend | 400544   | 1/100                  |
| Ultra-LEAF Purified anti-mouse CD3e          | 145-2C11    | BioLegend | 100340   | 1:100                  |
| Ultra-LEAF Purified anti-mouse CD28          | 37.51       | BioLegend | 102116   | 1:100                  |
| FITC anti-mouse IA/IE (MHC II)               | M5/114.15.2 | BioLegend | 107606   | 1:500                  |
| FITC anti-mouse CD24                         | M1/69       | BioLegend | 101806   | 1:500                  |
| PerCP/Cy5.5 anti-mouse CD45.2                | 104         | BioLegend | 109828   | 1:200                  |
| PE anti-mouse CD49d                          | R1-2        | BioLegend | 103608   | 1:200                  |
| PE anti-mouse CD11a/CD18 (LFA-1)             | H155-78     | BioLegend | 141006   | 1:200                  |
| PE anti-mouse CD1d                           | 1B1         | BioLegend | 123510   | 1:200                  |
| PE anti-mouse CD24                           | M1/69       | BioLegend | 101808   | 1:200                  |
| PE anti-mouse IA/IE (MHC II)                 | M5/114.15.2 | BioLegend | 107608   | 1:200                  |
| PE/Cy7 anti-mouse Ly-6C                      | HK1.4       | BioLegend | 128018   | 1:200                  |
| PE/Cy7 anti-mouse IFN- $\gamma$              | XMG1.2      | BioLegend | 505826   | 1:200                  |
| PE/Cy7 anti-mouse CD54 (ICAM1)               | YN1/1.7.4   | BioLegend | 116122   | 1:200                  |
| PE/Cy7 anti-mouse F4/80                      | BM8         | BioLegend | 123114   | 1:200                  |
| APC anti-mouse CD106 (VCAM1)                 | 429         | BioLegend | 105718   | 1:200                  |
| APC anti-mouse CD11c                         | N418        | BioLegend | 117310   | 1:200                  |
| Alexa Fluor 700 anti-mouse CD4               | GK1.5       | BioLegend | 100430   | 1:200                  |
| APC/Cy7 anti-mouse NK1.1                     | PK136       | BioLegend | 108724   | 1:200                  |
| APC/Cy7 anti-mouse CD11c                     | N418        | BioLegend | 117324   | 1:200                  |
| APC/Cy7 anti-mouse Ly-6C                     | HK1.4       | BioLegend | 128026   | 1:200                  |
| Pacific Blue anti-mouse TCR $\beta$          | H57-597     | BioLegend | 109226   | 1:500                  |
| Pacific Blue anti-mouse F4/80                | BM8         | BioLegend | 123124   | 1:500                  |
| Pacific Blue anti-mouse CD11b                | M1/70       | BioLegend | 101224   | 1:500                  |
| BV510 anti-mouse B220                        | RA3-6B2     | BioLegend | 103248   | 1:200                  |
| BV510 anti-mouse CD11b                       | M1/70       | BioLegend | 101263   | 1:200                  |
| BV510 anti-mouse IFN- $\gamma$               | XMG1.2      | BioLegend | 505842   | 1:200                  |
| BV510 anti-mouse IA/IE (MHC II)              | M5/114.15.2 | BioLegend | 107636   | 1:200                  |
| BV605 anti-mouse CD8 $\alpha$                | 53-6.7      | BioLegend | 100743   | 1:200                  |
| BV650 anti-mouse CD206                       | C068C2      | BioLegend | 141723   | 1:200                  |
| InVivoMAb anti-mouse CD49d                   | PS/2        | BioXcell  | BE0071   | 10 mg kg <sup>-1</sup> |
| InVivoMAb anti-mouse CD106 (VCAM1)           | M/K-2.7     | BioXcell  | BE0027   | 10 mg kg <sup>-1</sup> |
| InVivoMAb rat IgG2b isotype control          | LTF-2       | BioXcell  | BE0090   | 10 mg kg <sup>-1</sup> |
| InVivoMAb rat IgG1 isotype control           | HRPN        | BioXcell  | BE0088   | 10 mg kg <sup>-1</sup> |

| <b>Human antibodies</b>                  |                            |           |          |        |
|------------------------------------------|----------------------------|-----------|----------|--------|
| Purified anti-human CD106 (VCAM1)        | STA                        | BioLegend | 305802   | 1:100  |
| Purified Mouse IgG1                      | MOPC-21                    | BioLegend | 400101   | 1:100  |
| Purified anti-human CD3                  | OKT3                       | BioLegend | 317326   | 1:100  |
| Purified anti-human CD28                 | CD28.2                     | BioLegend | 302934   | 1:100  |
| FITC anti-human CD3                      | OKT3                       | BioLegend | 317306   | 1:100  |
| PE anti-human IFN- $\gamma$              | 4S.B3                      | BioLegend | 502509   | 1:100  |
| PE/Cy7 anti-human CD49d                  | 9F10                       | BioLegend | 304314   | 1:100  |
| APC anti-human CD106 (VCAM1)             | STA                        | BioLegend | 305810   | 1:100  |
| Alexa Fluor 700 anti-human IFN- $\gamma$ | 4S.B3                      | BioLegend | 502520   | 1:100  |
| BV510 anti-human CD8                     | SK1                        | BioLegend | 344732   | 1:100  |
| <b>Others</b>                            |                            |           |          |        |
| PE Donkey anti-rabbit IgG                | Poly4064                   | BioLegend | 406421   | 1:200  |
| anti-CDC42                               | EPR15620                   | Abcam     | ab187643 | 1:400  |
| anti-Src (phospho Y419)                  | EPR17734                   | Abcam     | ab185617 | 1:400  |
| APC mCD1d-PBS57 tetramer                 | NIH Tetramer Core Facility |           |          | 1:2000 |
| APC hCD1d-PBS57 tetramer                 | NIH Tetramer Core Facility |           |          | 1:2000 |
